# Supplementary material
Source: publisher figshare collection journal article supplement (https://tandf.figshare.com/ndownloader/files/9112996)
Supplement: Supplementary file 1 [file 9112996]

**APPENDIX 1**

**QUESTIONNAIRE**

Hospital Name:__________________ Date Received:_______ Date returned: _____

**Please respond to the following questions as openly and directly as you can.**

Tick the appropriate box or write your answer in the space provided

1. **Which level of care is your hospital?**

District

Regional

Academic

Psychiatric

TB

Other

If other specify

1. **Have you ever heard of Pharmacist and Therapeutics Committees (PTCs)?**

Yes No

1. **Do you have a PTC in your hospital?**

Yes No

1. **If No, why not?**
2. **If Yes, in what year was it introduced in your hospital?**
3. **How often does the PTC meet?**

| Monthly | Quarterly | Biannually | Other_______(specify) |
| --- | --- | --- | --- |

1. **Are you a member of the PTC**?

Yes No

1. **If Yes, for how long have you been in the committee?**
2. **What position do you hold in the committee?**
3. **Which of the following categories of professionals form part of your committee?**
   1. Clinical Specialists representing the major disciplines

Yes No

- 1. Clinical Experts Specialist- Pharmacology

Yes No

- 1. Head of Pharmacy from the University- Pharmacy School

Yes No

- 1. Nursing representatives

Yes No

- 1. Clinical Experts Specialist Microbiology

Yes No

- 1. Clinical Directors from Academic Hospitals

Yes No

- 1. Financial Director

Yes No

- 1. Secretariat

Yes No

Other please specify__________________________

1. **Which of the following functions are being carried out in your hospital PTC?**
   1. Developing formularies

Yes No

- 1. Reviewing the National Treatment Guidelines

Yes No

- 1. Preparation of new standard treatment guidelines where applicable

Yes No

- 1. Drafting and coordinating the implementation of the treatment guidelines

Yes No

- 1. Formulating policies and guidelines pertaining to the use of drugs within the hospital

Yes No

- 1. Monitoring expenditure on drugs ensuring that it is in line with the current budgets so as to maintain rational and cost-effective prescribing practices.

Yes No

- 1. Carrying out drug utilization reviews.

Yes No

- 1. Ensuring that a proper down referral system exists

Yes No

- 1. Initiating educational programmes in matters relating to drug therapy.

Yes No

- 1. Disseminating decisions of the committee to all staff members.

Yes No

- 1. Developing and enforcing standard guidelines for representative visiting the hospital.

Yes No

- 1. Supporting research activities by reviewing protocols and evaluating data relating to new drugs used in the hospitals.

Yes No

- 1. Collecting and processing reports of adverse drug reactions.

Yes No

1. **Which of the following sub-committees does your PTC have? (please tick to select)**

Formulary committees

Antimicrobial

Infection control

Adverse drug reactions committee

Other

If other specify

1. **Briefly state the challenges that the PTC in your hospital encounter**
